# Supplementary material
Source: Research Square preprint supplement (doi:10.21203/rs.3.rs-9236452/v1)
Supplement: Supplementary file 1 [file a3859ca68a2e4a5e0693dade.docx]

# Supplementary Materials


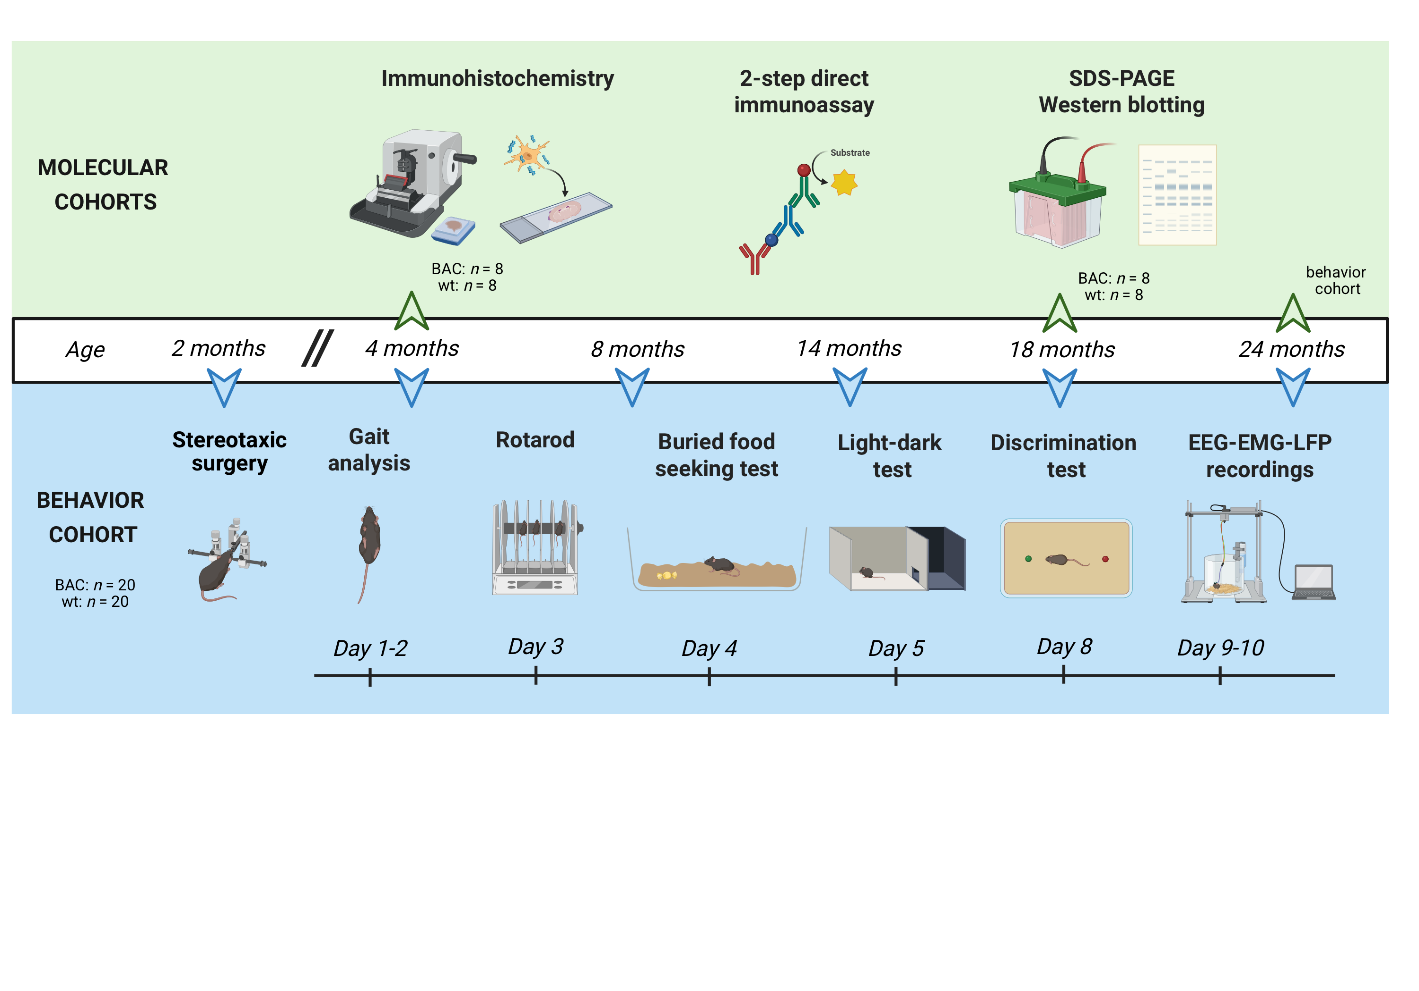


Supplementary Figure 1 Schematic representation of the experimental design. A behavior cohort (wt: *n = 21*; *SNCAA53T/-*: *n* = 20), designated to explore functional readouts related to Parkinson’s disease, underwent a stereotaxic brain surgery at 2 months of age to implement epidural, intracortical and intramuscular electrodes. These mice were followed longitudinally until the age of 24 months by a battery of behavioral assessments including CatWalk gait analysis at day 1-2, Rotarod motor performance at day 3, buried food seeking test at day 4, light-dark test at day 5, olfactory discrimination test at day 8 and EEG-EMG and LFP recordings at day 9-10. Additionally, molecular pathology was assessed by immunohistochemistry at intermediate stages (4 months and 8 months: wt: *n* = 8 and *SNCAA53T/-*: *n* = 8) and at 24 months in mice from the behavior cohort, together with a two-step direct immunoassay and SDS-PAGE western blotting. This approach allowed correlation of functional outcomes with pathology. This figure was created through BioRender.com. wt = wild-type mice, BAC = heterozygous *A53T-SNCA* BAC mice, LFP = local field potential.


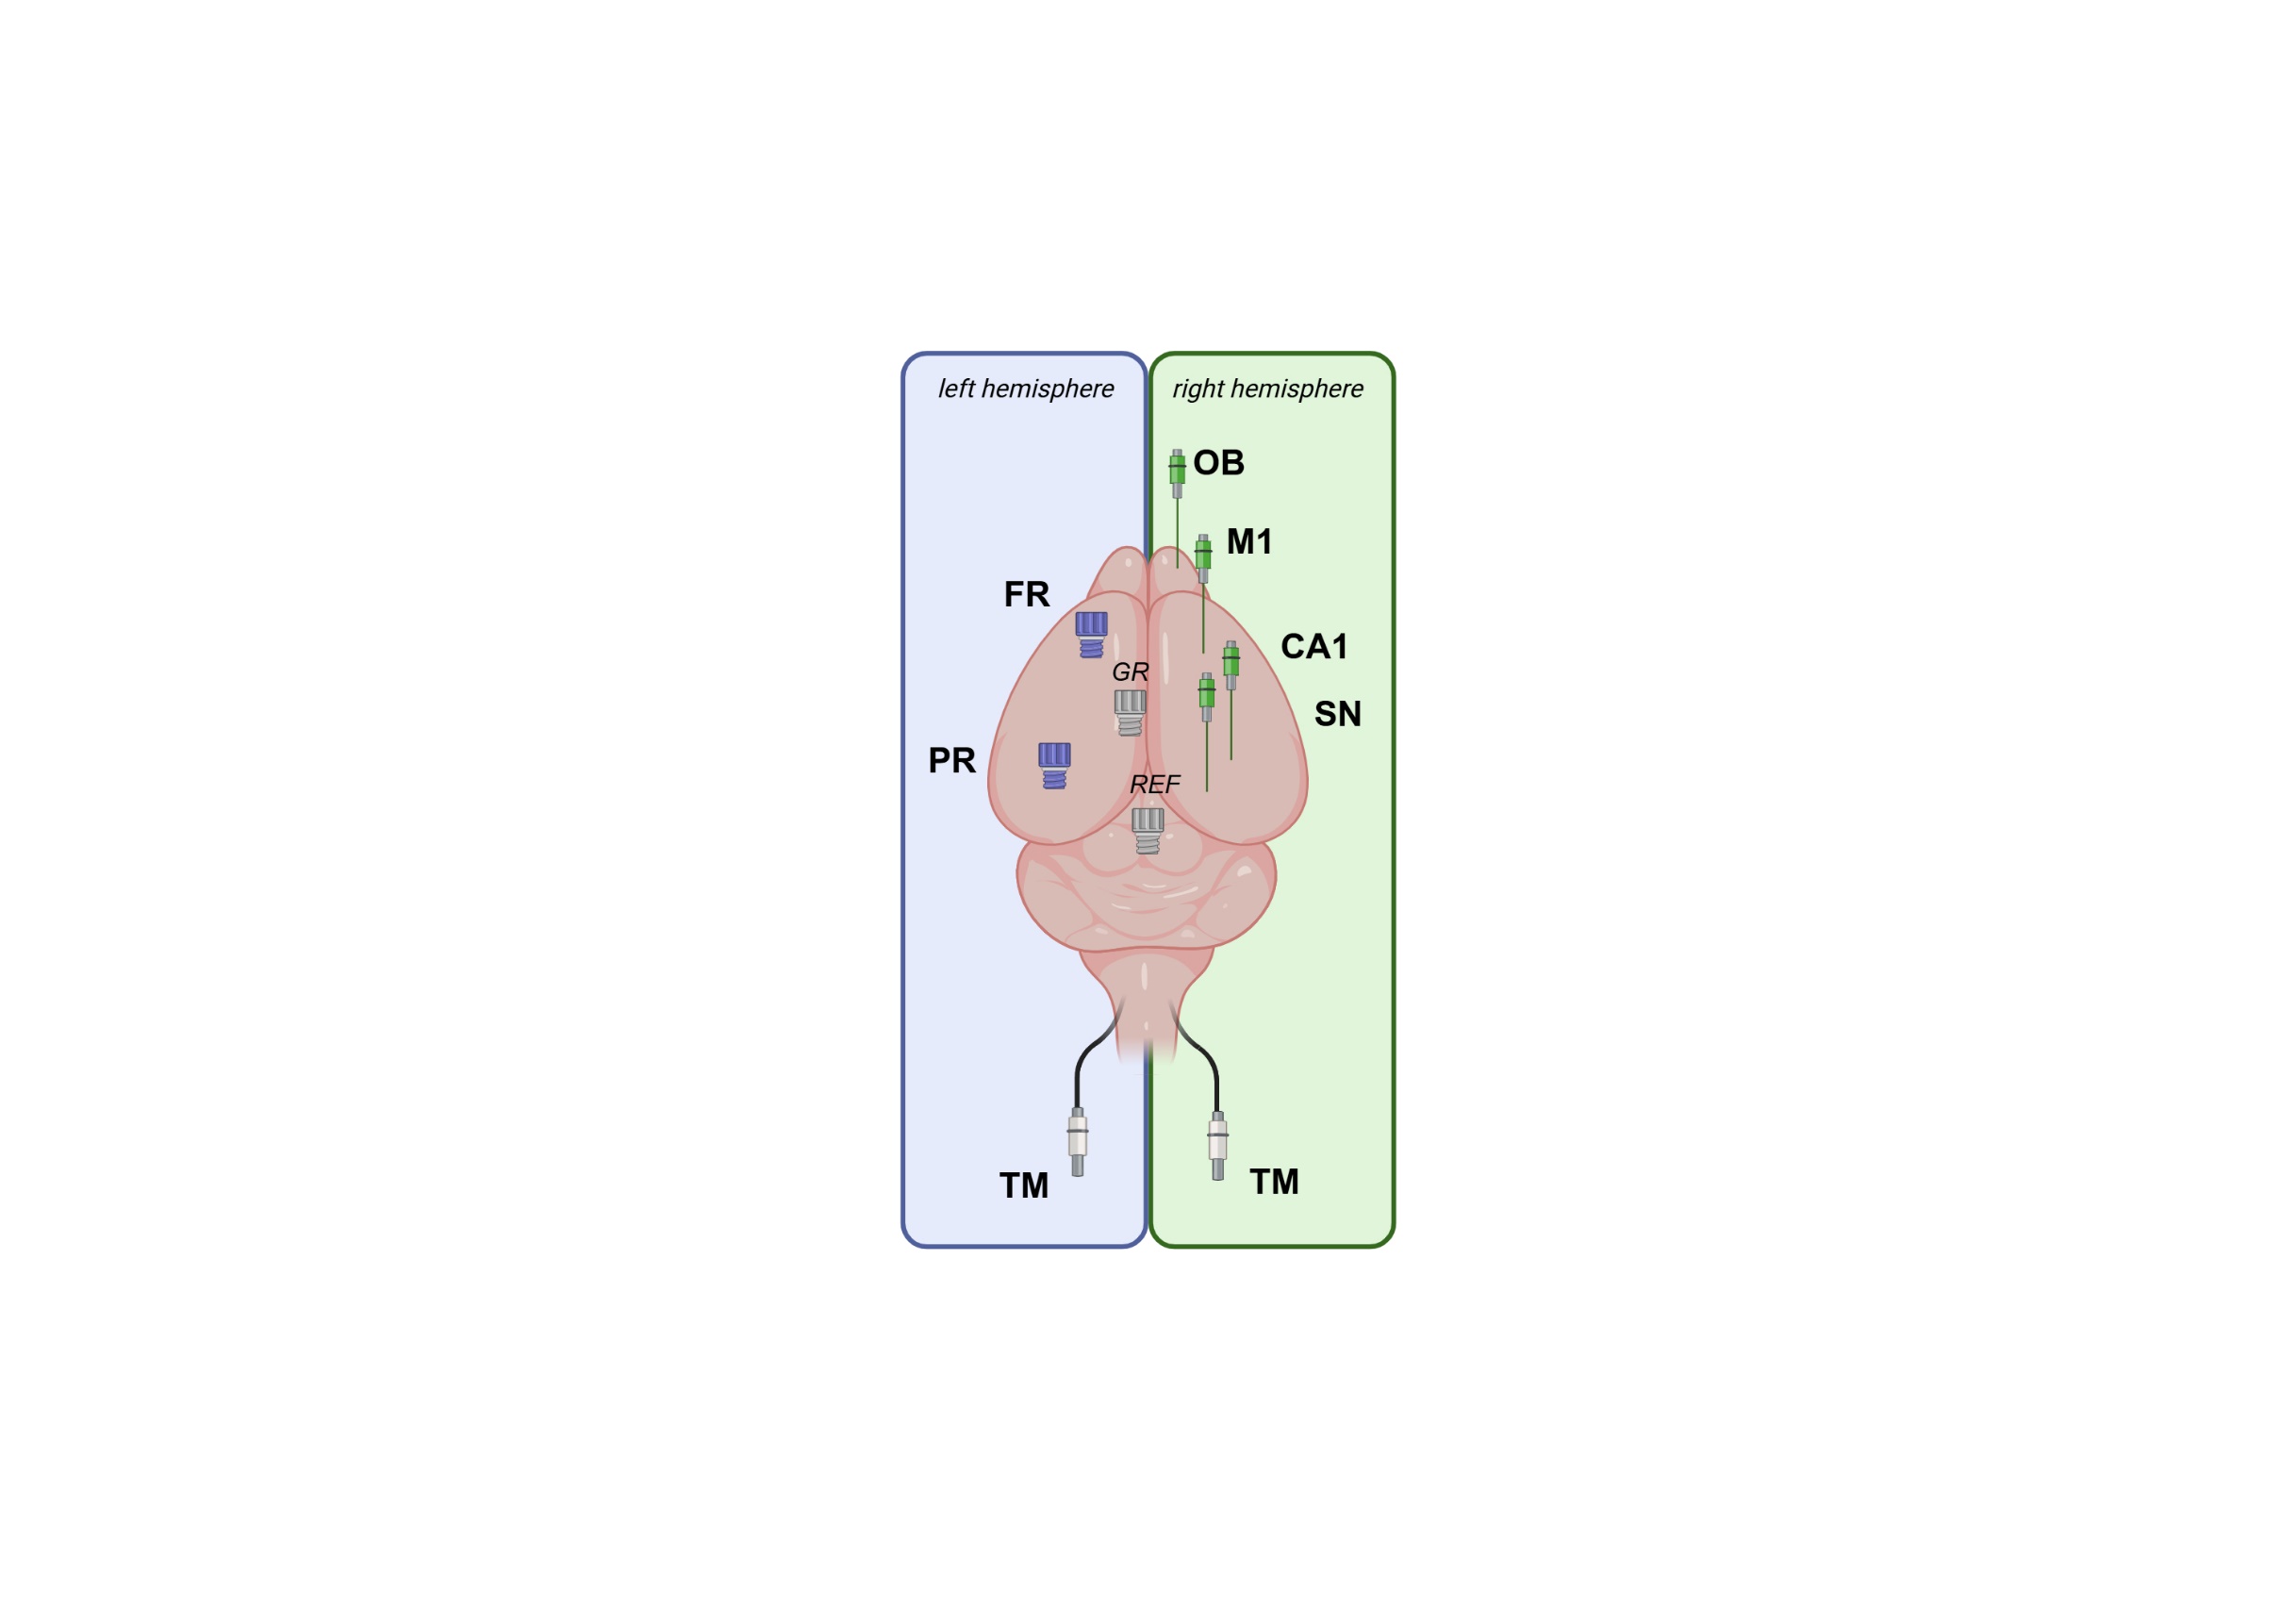


**Supplementary Figure 2 Overview of electrode configuration.** Left hemisphere is implemented with epidural electrodes for EEG recording. Right hemisphere is implemented with intracortical electrodes for LFP recording. Two fine-wired electrodes will be inserted in left and right trapezius muscles. FR = frontal cortex, PR = parietal cortex, GR = ground, REF = reference, OB = olfactory bulb, M1 = primary motor cortex, CA1 = cornus ammonis 1, SN = substantia nigra, TM = trapezius muscle.

**
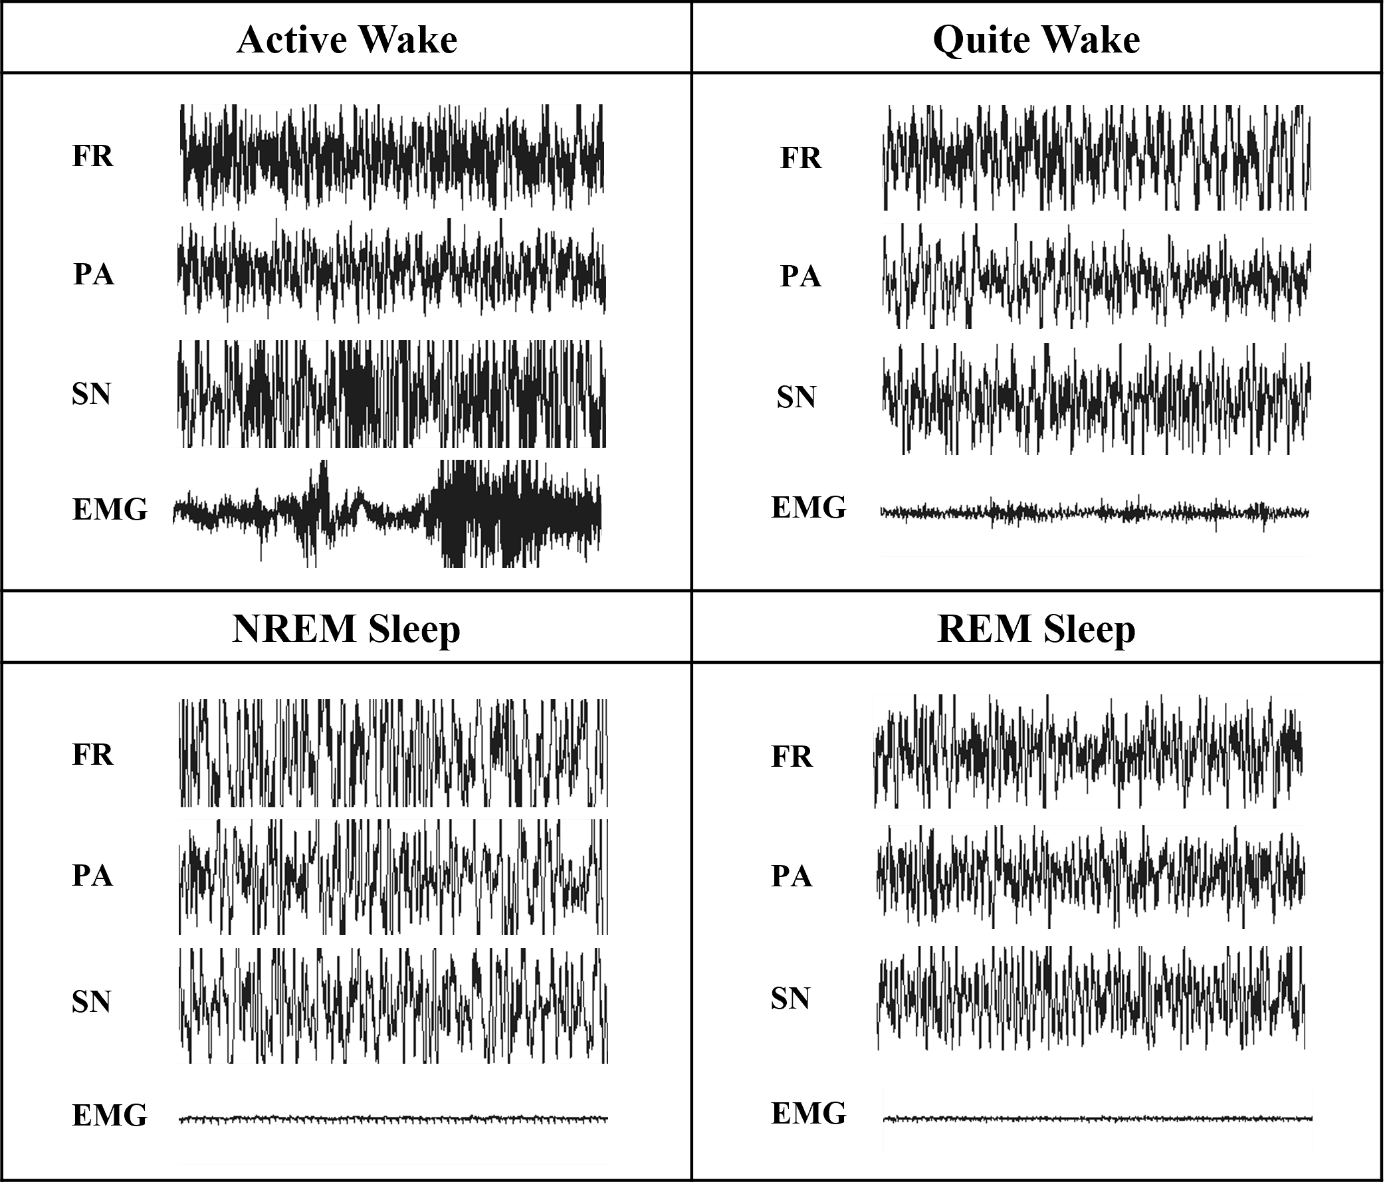
**

**Supplementary Figure 3** **Electrophysiological traces of each vigilance state.** REM = Rapid Eye Movement, NREM = Non-Rapid Eye Movement, FR = Frontal Epidural Electrode, PA = Parietal Epidural Electrode, SN = Substantia Nigra Intracortical Electrode, EMG = electromyography.


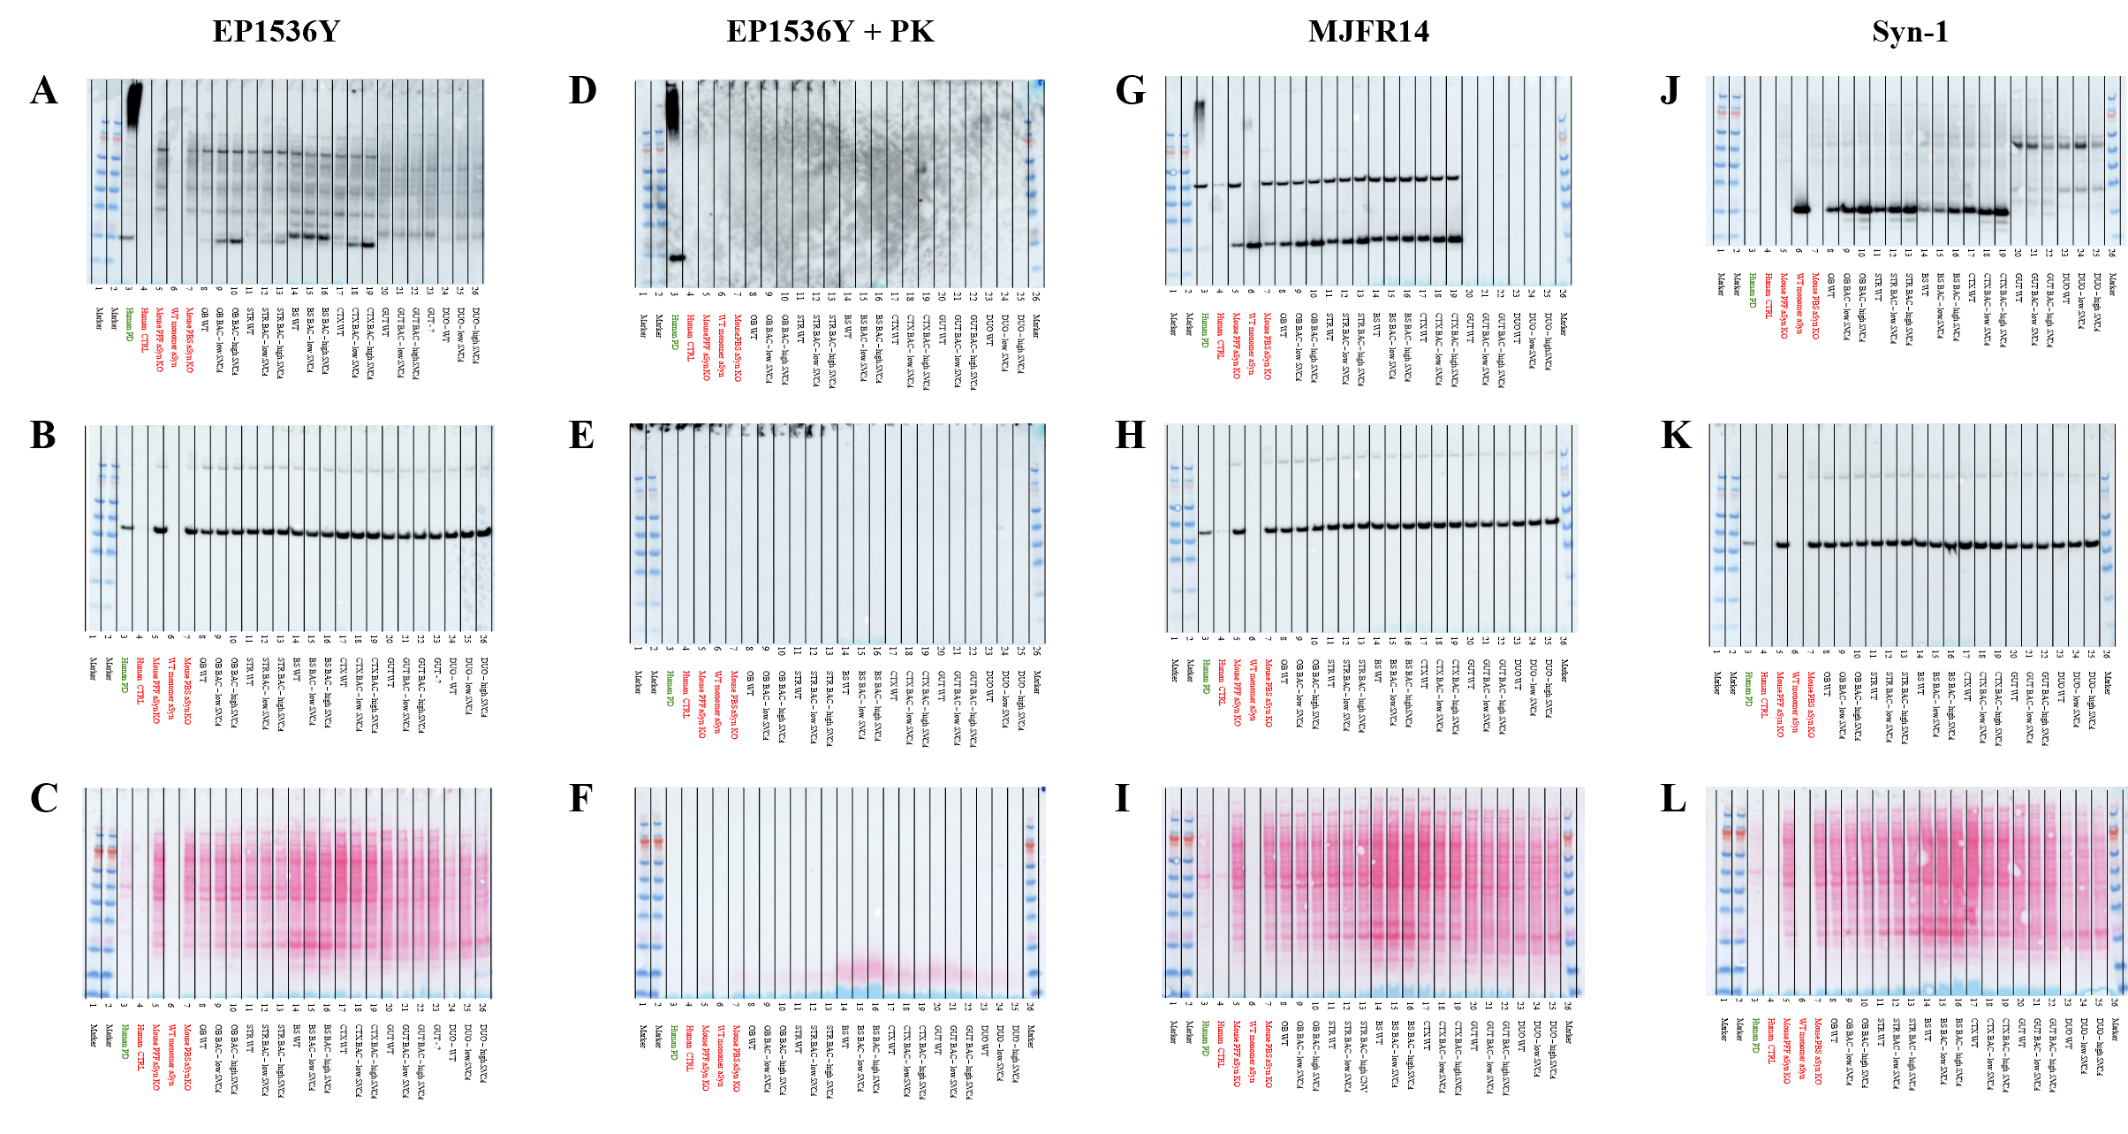


Supplementary Figure 4 ****Original SDS-PAGE Western blot membranes of pooled olfactory bulb, striatum, brainstem and cortex homogenates of 24-month-old *SNCAA53T/-* BAC mice.** **(A-C)** All original membranes correspond to **Figure 2A**, including EP1536Y staining with 30s-exposure **(A)**, β-actin staining with 30s-exposure **(B)** and Ponceau staining **(C)**. **(D-F)** All original membranes correspond to **Figure 2B**, including EP1536Y staining on Proteinase K-treated homogenates with 30sec exposure **(D)**, β-actin staining with 30s-exposure **(E)** and Ponceau staining **(F)**. **(G-I)** All original membranes correspond to **Figure 2C**, including MJFR14 staining with 30s-exposure **(G)**,β-actin staining with 30s-exposure **(H)** and Ponceau staining **(I)**. **(J-L)** All original membranes correspond to **Figure 2D**, including Syn-1 staining with 10sec exposure **(J)**, β-actin staining with 30sec exposure **(K)** and Ponceau staining **(L)**. Abbreviations are as follows: PK = proteinase K, PD = Parkinson’s Disease, CTRL = control, α-Syn = α-Synuclein, PBS = phosphate-buffered saline, PFF = α-Syn preformed fibrils, α-Syn KO = α-Syn knock-out, WT = wild-type, BAC = bacterial artificial chromosome, OB = olfactory bulb, STR = striatum, BS = brainstem, CTX = cortex, GUT = stomach, DUO = duodenum.**

Supplementary Figure 5 pS129-α-Syn immunoreactivity in *SNCAA53T/-* BAC mice does not evolve over time. Representative images of olfactory bulbs of wild-type and high *SNCAA53T/-*mice reveal an increase in pS129-α-Syn [EP1536Y] immunoreactivity that remains constant over time. 4 months: wt (*n* = 6) and high *SNCAA53T/-* (*SNCA* copies: 57.7, *n* = 3) & 18 months: wt (*n* = 13) and high *SNCAA53T/-* (*SNCA* copies: 56.5, *n* = 6). *SNCAA53T/-*BAC mice exhibit pS129-α-Syn depositions in inner plexiform layer, granule cell layer and subependymal zone, absent in wild-type mice. I = anterior olfactory bulb; II = glomerular to granular layers; III = subependymal zone.

**
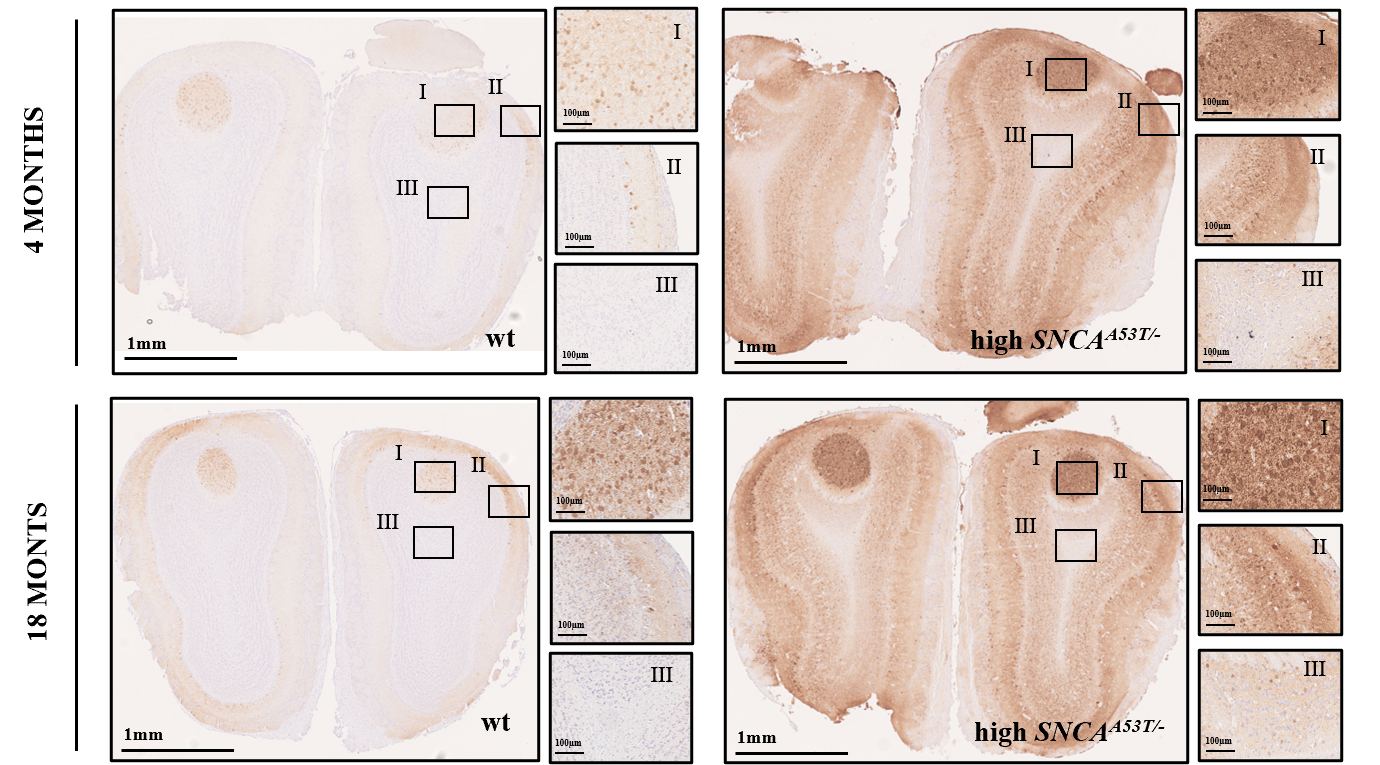
**

**Supplementary Table 1 List of Primary and Secondary Antibodies**

| **Antibody** | **Application** | **Working Concentration/Dilution** | **Host** | **Reference Number** | **Company** |
| --- | --- | --- | --- | --- | --- |
| **Anti-pS129-α-Synuclein antibody [EP1536Y]** | Immunohistochemistry *1h incubation* | 0.5µL/mL in primary antibody diluent (Leica, AR9352) | Rabbit | ab51253 | Abcam |
| SDS PAGE Western blotting | 1µg/mL in 5% non-fat milk blocking buffer |
| **Anti-Tyrosine Hydroxylase antibody** | Immunohistochemistry *Overnight incubation* | 1:1000 in primary antibody diluent (Leica, AR9352) | Rabbit | AB152 | Millipore |
| **Dako EnVision+ System - HRP Labelled Polymer Anti-Rabbit** | Immunohistochemistry | NA – ready to use | Goat | K4003 | Agilent |
| **Anti-α-Synuclein aggregate antibody  [MJFR-14-6-4-2]** | SDS PAGE Western blotting | 1µg/mL in 5% non-fat milk blocking buffer | Rabbit | ab209538 | Abcam |
| **Anti-β-Actin-Peroxidase antibody** | SDS PAGE Western blotting | 1:20 000 in in 5% non-fat milk blocking buffer | Mouse | A3854 | Sigma-Aldrich |
| **HRP Labelled Anti-Mouse** | SDS PAGE Western blotting | 1:3000 in TBS-T wash buffer | Sheep | NA931V | Cytiva |
| **HRP Labelled Anti-Rabbit** | SDS PAGE Western blotting | 1:5000 in TBS-T wash buffer | Donkey | NA934V | Cytiva |
| **Anti-pS129-α-Synuclein antibody  [MJF-R13 (8-8)]** | 2-step direct immunoassay  (Coating) | 0.5µg/mL in PBS | Rabbit | ab168381 | Abcam |
| **Anti-pS129-α-Synuclein**  **antibody**  **[81A]** | 2-step direct immunoassay  (Primary Detection) | 1µg/mL in 0.1% casein in PBS | Mouse | 825701 | Biolegend |
| **SULFO-TAG Labelled Anti-Mouse** | 2-step direct immunoassay (Secondary Detection) | 1µg/mL in 0.1% casein in PBS | Rabbit | R32AB-1 | MSD |
